# Supplementary material for: Study Protocol for a Hospital-to-Home Transitional Care for Older Adults Hospitalized with Chronic Obstructive Pulmonary Disease in South Korea: A Randomized Controlled Trial
Source: MDPI journal article supplement (doi:10.3390/ijerph20156507), 2023-08-02
Supplement: s1 [file s1]

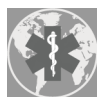

## Supplementary Material

**Table. S1** Study measurements

| Timepoint                                              | Training               | Eligibility<br>Screening | Enrollment<br>(t <sub>1</sub> )          | Allocation | Post-Allocation    |                                           |                                    | Follow-up               |                         |
|--------------------------------------------------------|------------------------|--------------------------|------------------------------------------|------------|--------------------|-------------------------------------------|------------------------------------|-------------------------|-------------------------|
|                                                        |                        |                          | within 72 hours<br>of<br>hospitalization |            | In the<br>hospital | Within 48<br>hours<br>before<br>discharge | Within 48<br>hours of<br>discharge | 1m<br>(t <sub>2</sub> ) | 3m<br>(t <sub>3</sub> ) |
| Enrolment :                                            |                        |                          |                                          |            |                    |                                           |                                    |                         |                         |
| Training of CRC, Multidisciplinary team                | X                      |                          |                                          |            |                    |                                           |                                    |                         |                         |
| Eligibility Screen by CRC                              |                        | X                        |                                          |            |                    |                                           |                                    |                         |                         |
| Invitation to Participate                              |                        |                          | X                                        |            |                    |                                           |                                    |                         |                         |
| Validation and Informed Consent                        |                        |                          | X                                        |            |                    |                                           |                                    |                         |                         |
| Participant Randomization                              |                        |                          |                                          | X          |                    |                                           |                                    |                         |                         |
| Intervention :                                         |                        |                          |                                          |            |                    |                                           |                                    |                         |                         |
| Usual Care                                             |                        |                          |                                          |            | X                  |                                           |                                    | X                       | X                       |
| Discharged Patient Health Management Program           | Education              |                          |                                          |            | X                  | X                                         | X                                  | X                       |                         |
|                                                        | Linking social welfare |                          |                                          |            | X                  |                                           |                                    | X                       | X                       |
|                                                        | Home Visiting          |                          |                                          |            |                    |                                           | X                                  | X                       |                         |
|                                                        | Telephone counseling   |                          |                                          |            |                    |                                           |                                    | x x x x                 |                         |
| Measures :                                             |                        |                          |                                          |            |                    |                                           |                                    |                         |                         |
| Modified Medical Research Council (mMRC) Dyspnea Scale |                        |                          | X                                        |            |                    |                                           |                                    | X                       | X                       |
| COPD Assessment Test (CAT)                             |                        |                          | X                                        |            |                    |                                           |                                    | X                       | X                       |
| Demonstration of inhaler technique                     |                        |                          | X                                        |            |                    |                                           |                                    | X                       | X                       |

|                                                                                   |   |   |   |
|-----------------------------------------------------------------------------------|---|---|---|
| Test of the Adherence to Inhalers (TAI)                                           | X | X | X |
| Hospitalization and emergency room visits                                         | X | X | X |
| Exacerbation History                                                              | X | X | X |
| Demographic questions                                                             | X | X | X |
| Smoking                                                                           | X | X | X |
| Prescreening Korean Dementia Screening Questionnaire (KDSQ-P)                     | X | X | X |
| Hospital anxiety and depression scale (HADS)                                      | X | X | X |
| Self-efficacy (SE) scale                                                          | X | X | X |
| Necessity for Social Welfare Service                                              | X | X | X |
| Instrumental Activities of Daily Living (IADL) / Activities of Daily Living (ADL) | X | X | X |
| Patient Experience Assessment (PEA)                                               | X |   |   |
| Partners at Care Transitions Measure (PACT-M1)                                    | X |   |   |
| Partners at Care Transitions Measure (PACT-M2)                                    |   | X | X |
